# Supplementary material for: Impacts of enhanced weathering on biomass production for negative emission technologies and soil hydrology
Source: Copernicus journal article supplement (doi:10.5194/bg-17-2107-2020), 2020-04-17
Supplement: Supplementary file 1 [file bg-17-2107-2020-supplement.zip]

Archive with 3 entries (3 files):
- S1.pdf
- bg-17-2107-2020-supplement-title-page.pdf
- S2.xlsx
