# Supplementary material for: Impacts of enhanced weathering on biomass production for negative emission technologies and soil hydrology
Source: Copernicus journal article supplement (doi:10.5194/bg-17-2107-2020), 2020-04-17
Supplement: Supplementary file 1 [file bg-17-2107-2020-supplement.zip › bg-17-2107-2020-supplement-title-page.pdf]

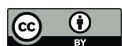

## *Supplement of*

# **Impacts of enhanced weathering on biomass production for negative emission technologies and soil hydrology**

**Wagner de Oliveira Garcia et al.**

*Correspondence to:* Wagner de Oliveira Garcia ([wagner.o.garcia@gmail.com](mailto:wagner.o.garcia@gmail.com))

- [bg-17-2107-2020-supplement-title-page.pdf](#)
- [S1.pdf](#)
- [S2.xlsx](#)

The copyright of individual parts of the supplement might differ from the CC BY 4.0 License.
